# Supplementary material for: Remote sensing reveals fire-driven facilitation of a C 4 rhizomatous alien grass on a small Mediterranean volcanic island
Source: Copernicus journal article supplement (doi:10.5194/bg-2023-19), 2023-03-21
Supplement: Supplementary file 1 [file bg-2023-19-supplement.pdf]

## Supplement 1 - Selected photos

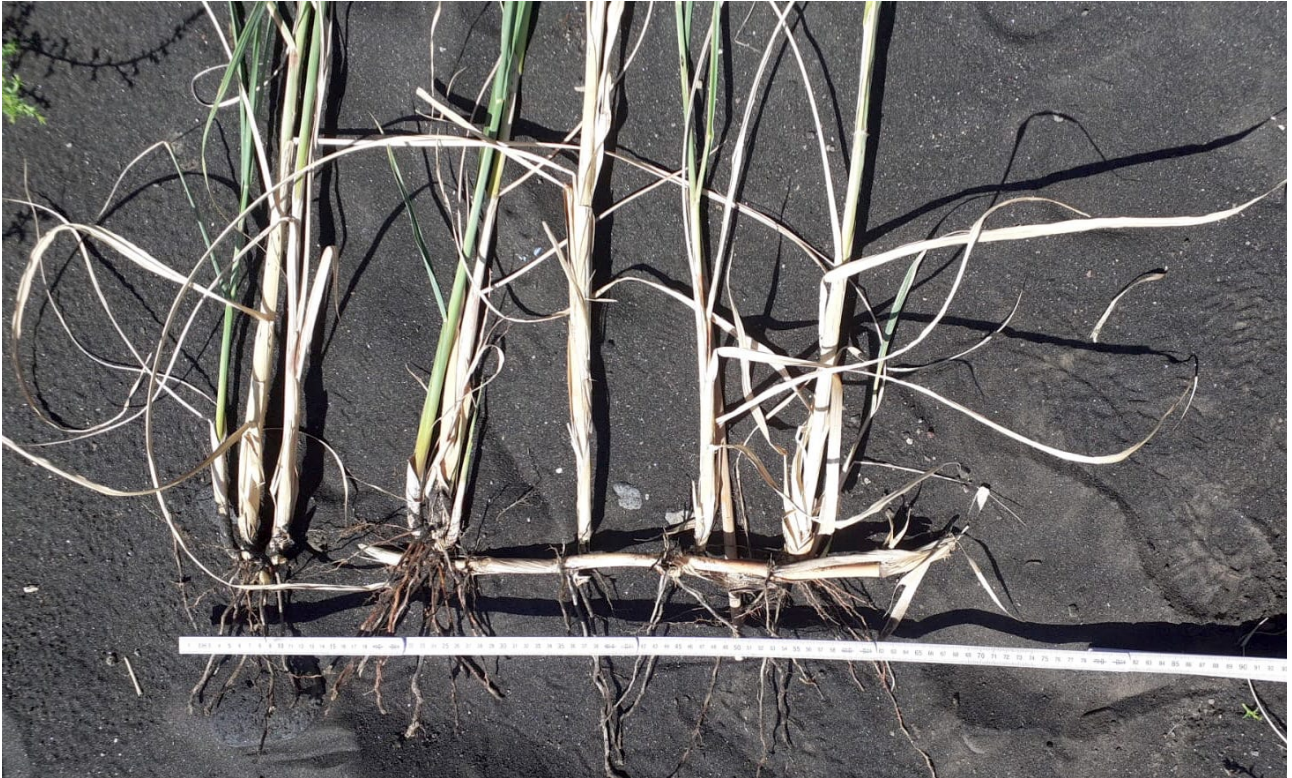

**Fig. S1** - Rhizome of *Saccharum biflorum* (Stromboli, 19 Sept. 2022, credits: Riccardo Guarino).

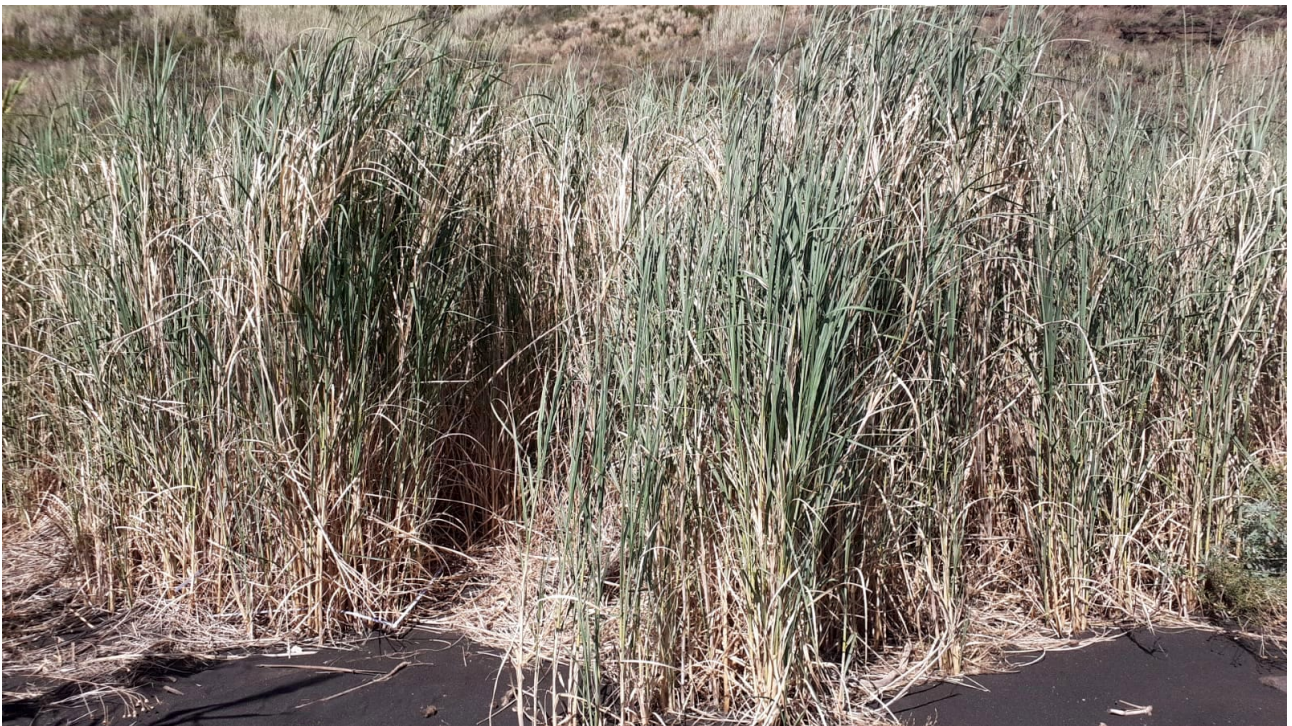

**Fig. S2** - Unburned patch of *Saccharum biflorum*, with plenty of dry biomass that facilitates combustion in case of fire (Stromboli, 19 Sept. 2022, credits: Riccardo Guarino).



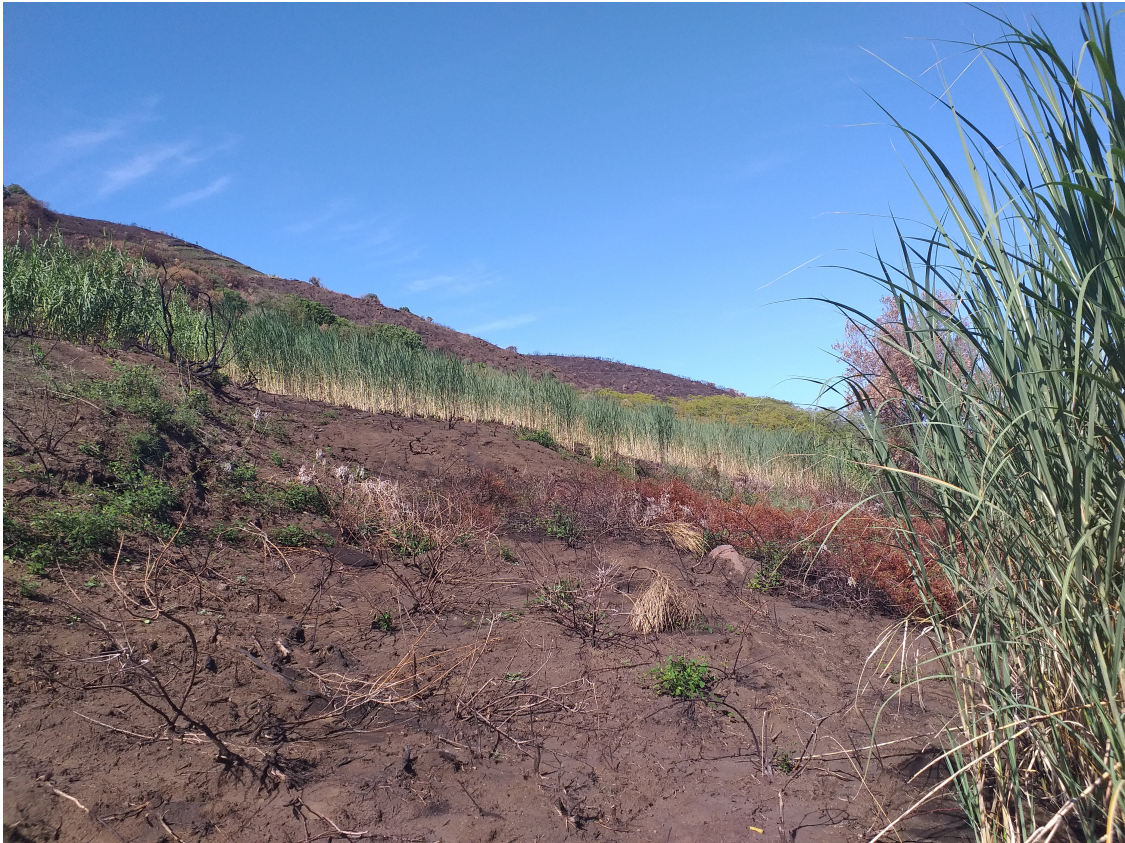

**Fig. S3** - Resprouted patches of *Saccharum biflorum*, with burned remains of garrigue in the foreground. In the background (right half of the photo), a patch of garrigue fortuitously spared from the fire is visible (18 Sept. 2022, credits: Riccardo Guarino).

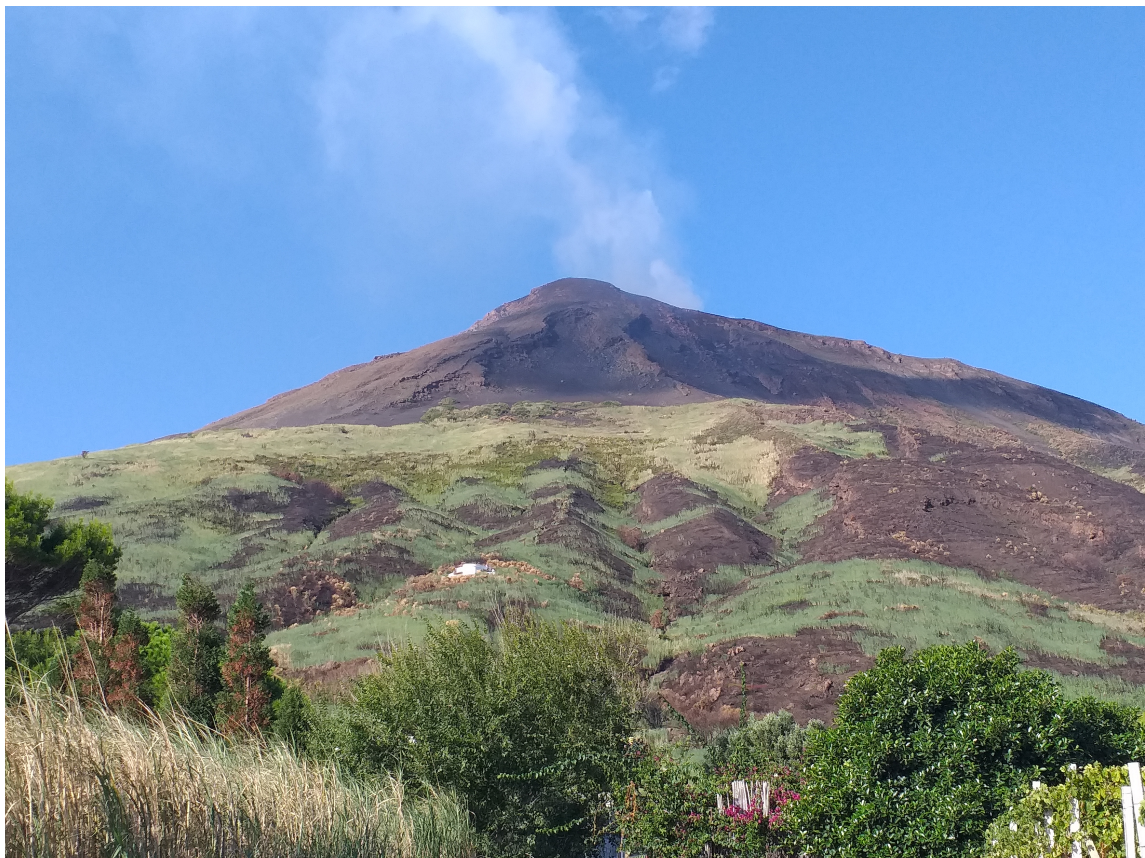

**Fig. S4** - Chromatic contrast between the burned (below, greyish green) and unburned (above, yellowish) patches of *Saccharum biflorum*. Stromboli, north-eastern flank (18 Sept. 2022, credits: Riccardo Guarino).



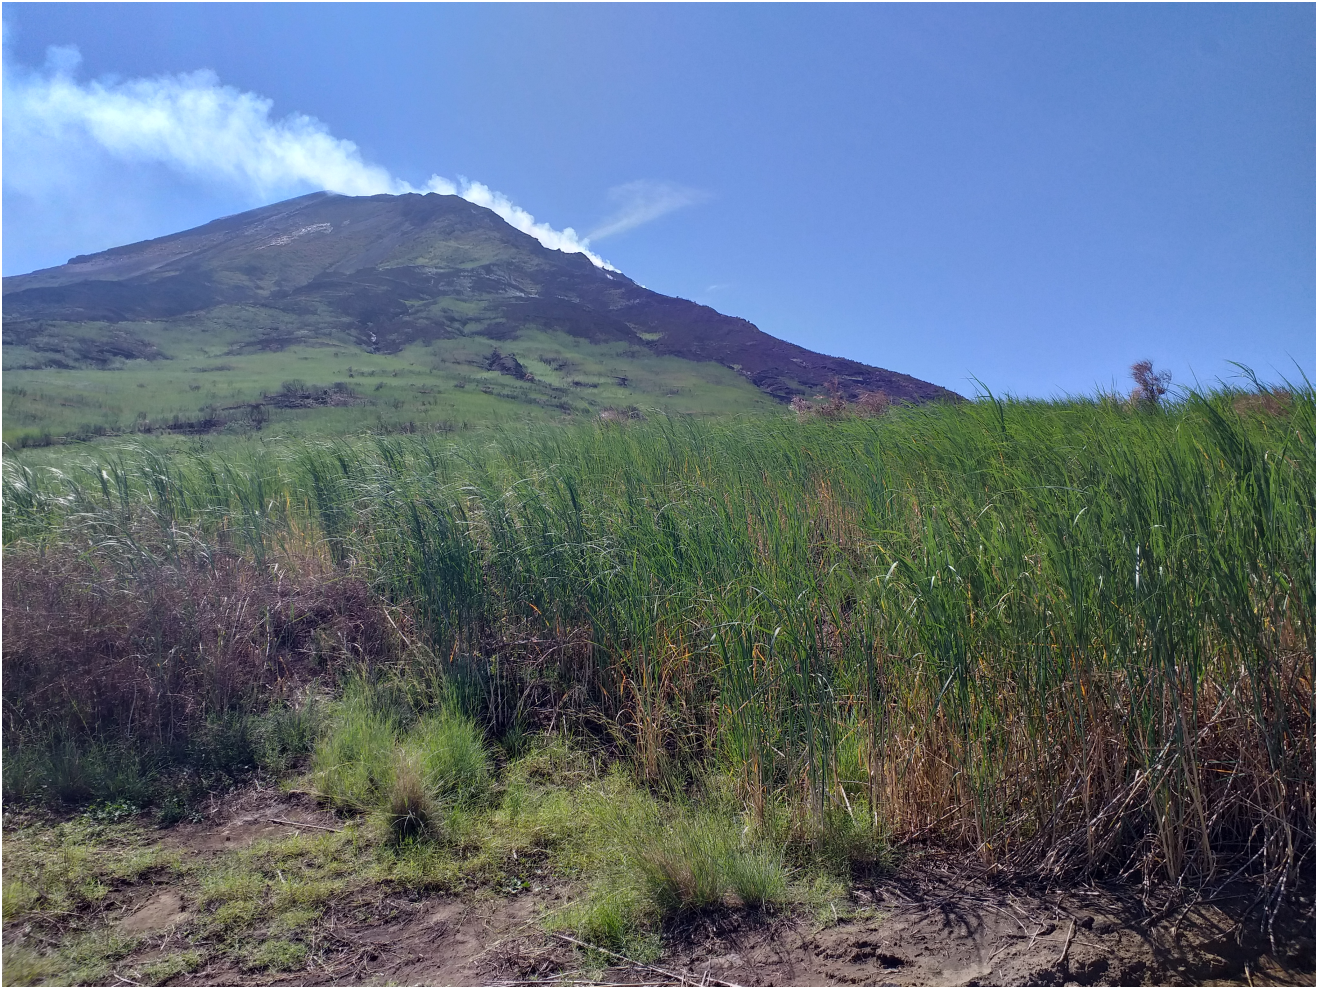

**Fig. S5** - Resprouted patches of *Saccharum biflorum*, up to the limit of the continuous vegetation. In the foreground, sparse tussocks of *Hyparrhenia hirta*. Stromboli, northern flank (18 Sept. 2022, credits: Riccardo Guarino).

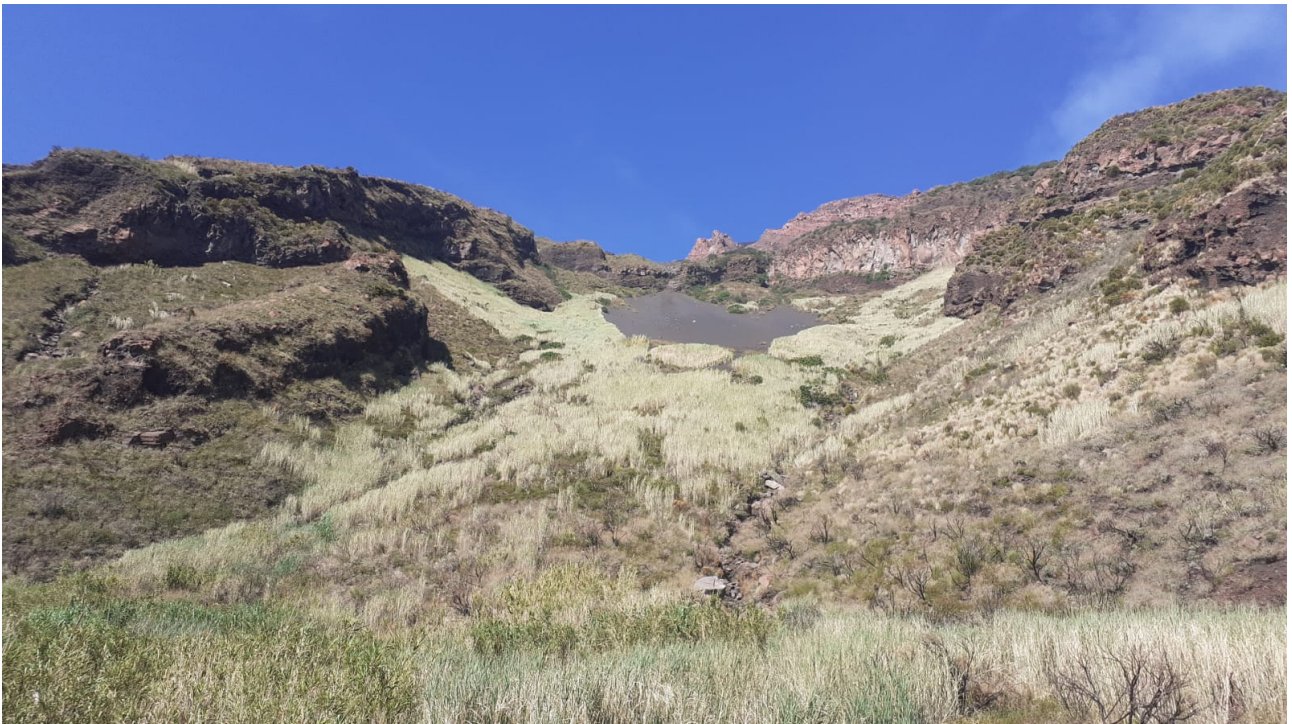

**Fig. S6** - View of unburned patches of *Saccharum biflorum* fringing the sand deposits of Rina Grande. Stromboli, south-eastern flank (19 Sept. 2022, credits: Riccardo Guarino).



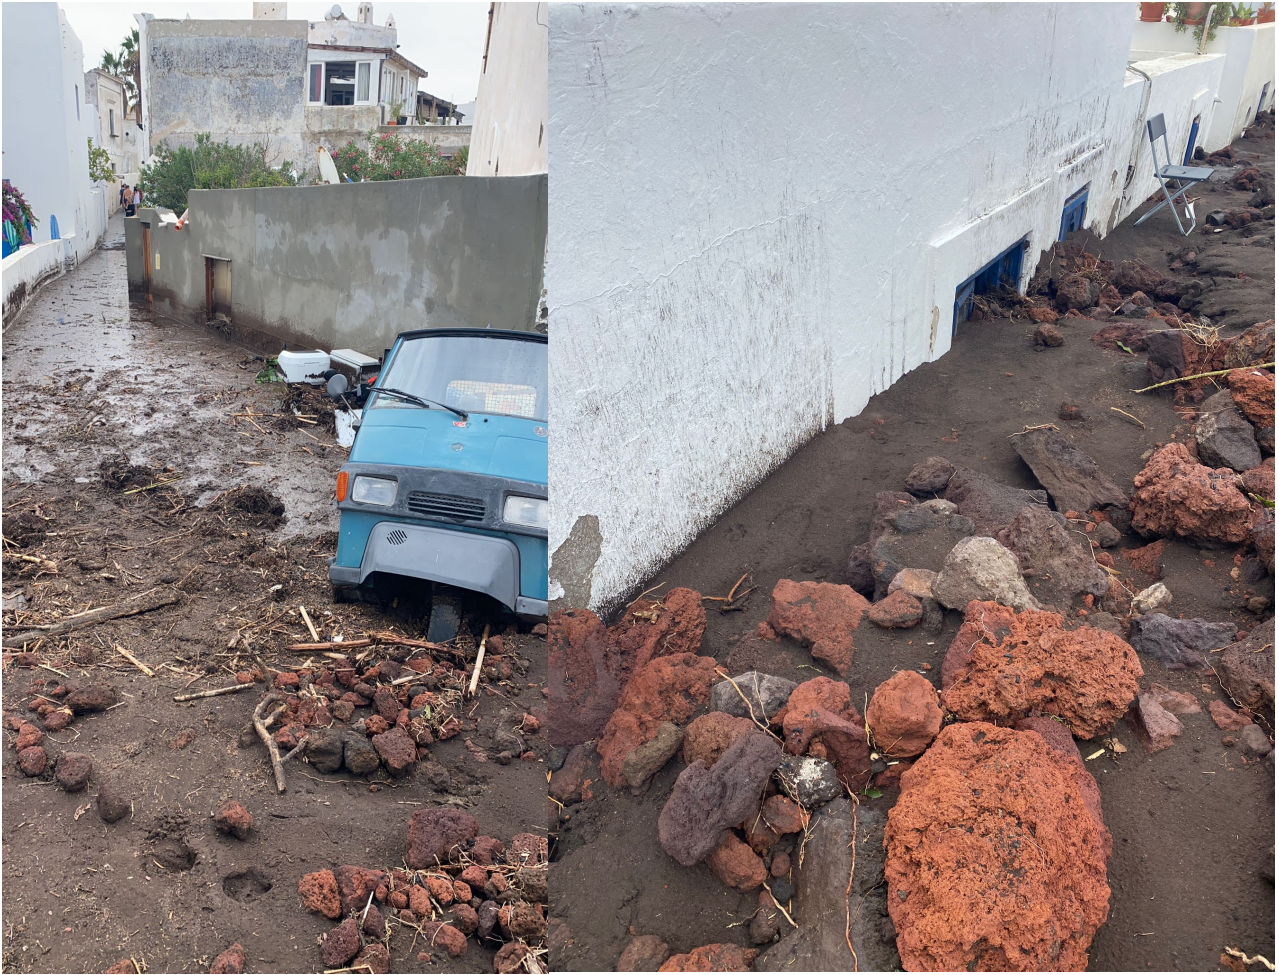

**Fig. S7** - Alluvial deposits in the streets of Piscità, after the storm of 12 August 2022 (credits: Renzo Zaia).
